# Supplementary material for: Imputation Without Doing Imputation: A New Method for the Detection of Non-Genotyped Causal Variants
Source: PubMed Central journal article supplement (PMC4150535; doi:10.1002/gepi.21792), 2014-02-17

### Multiplicative Correlation Metric

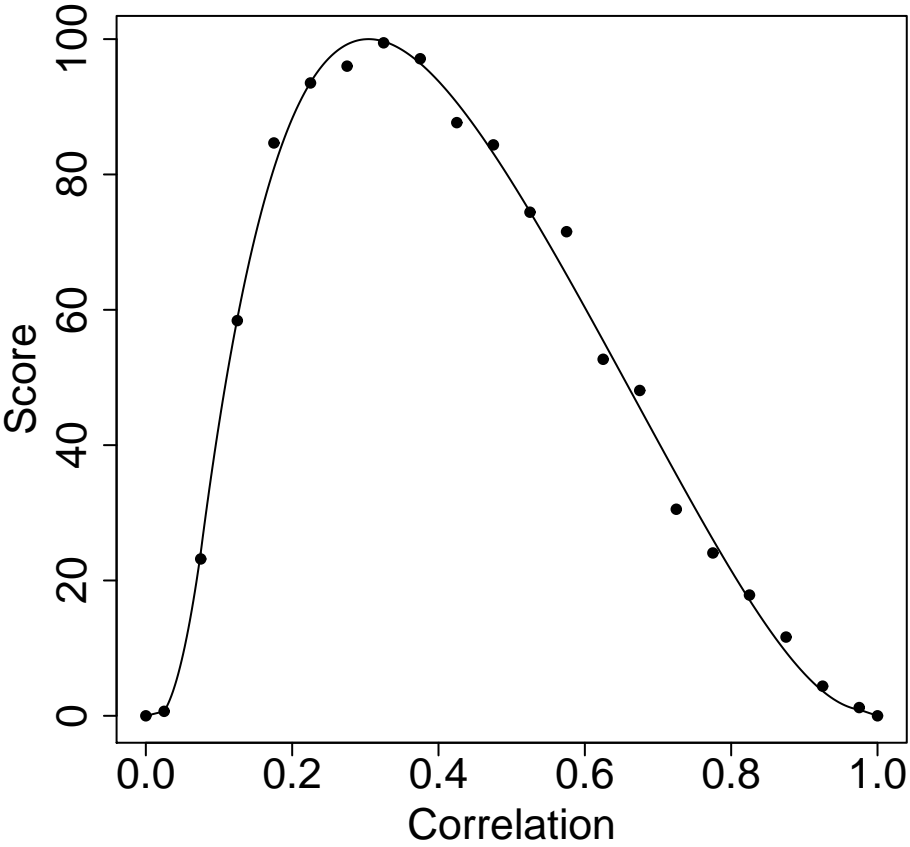

### Dominant Correlation Metric

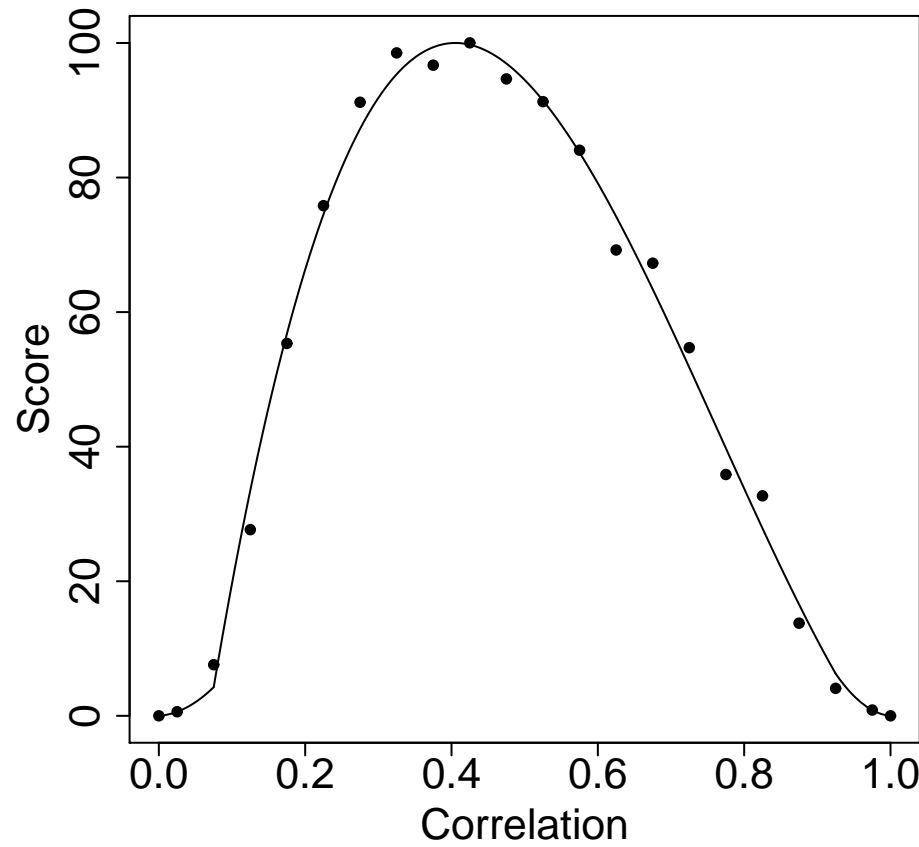

### Recessive Correlation Metric

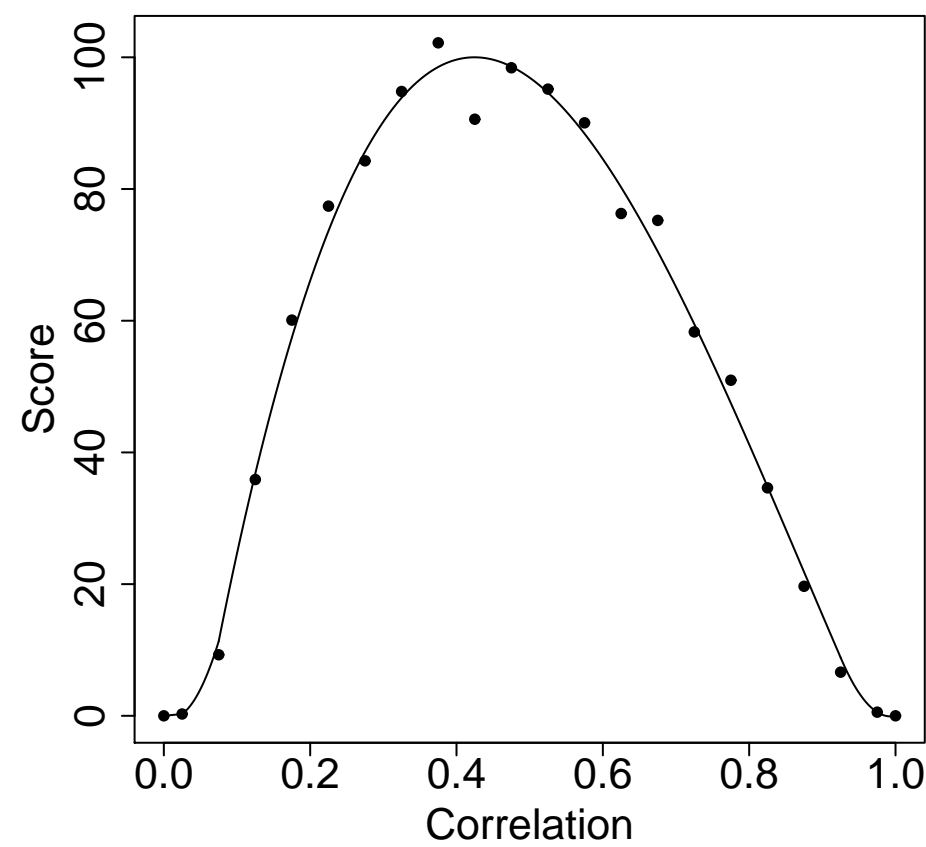

Supplement: gepi0038-0173-sd1.pdf [file gepi0038-0173-sd1.pdf]
