# Supplementary material for: Imputation Without Doing Imputation: A New Method for the Detection of Non-Genotyped Causal Variants
Source: PubMed Central journal article supplement (PMC4150535; doi:10.1002/gepi.21792), 2014-02-17

**Dominant Scenario 1 Power**

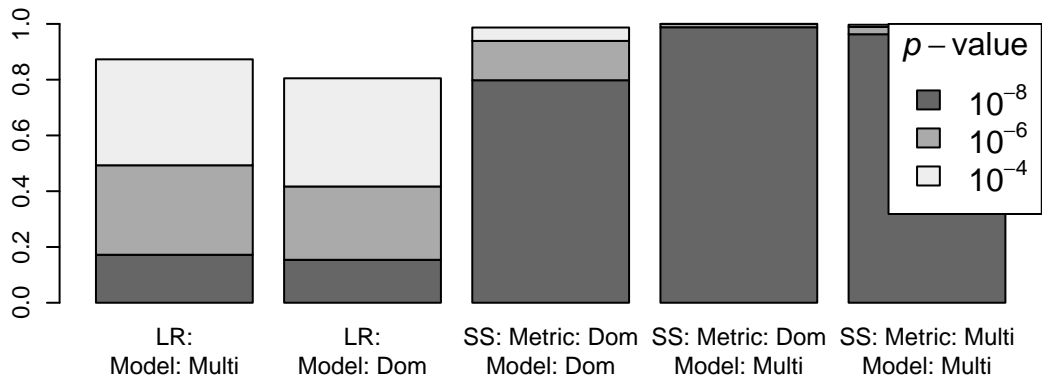

**Recessive Scenario 1 Power**

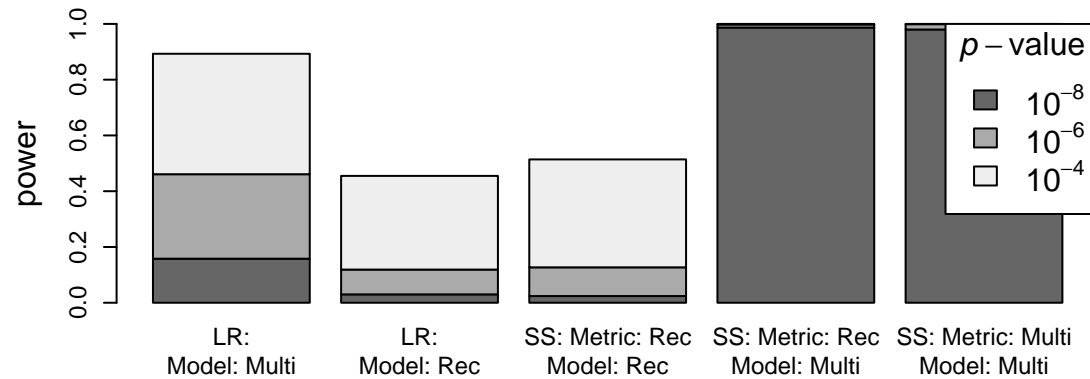

**Dominant Scenario 2 Power**

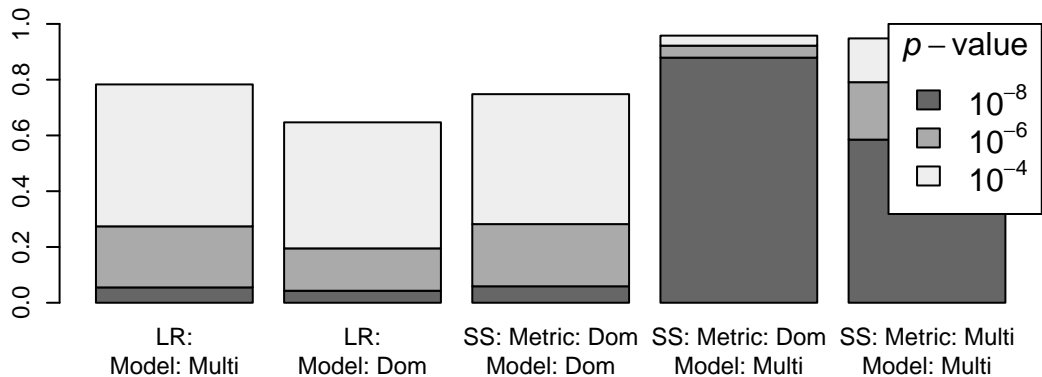

**Recessive Scenario 2 Power**

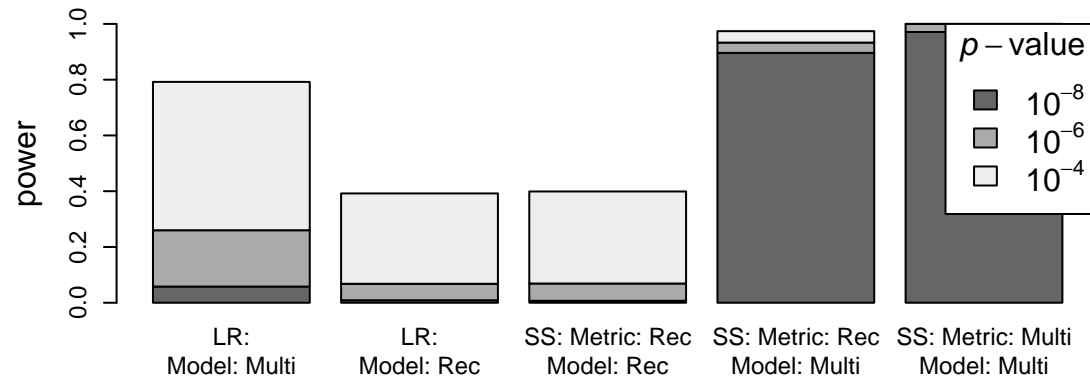

**Dominant Scenario 3 Power**

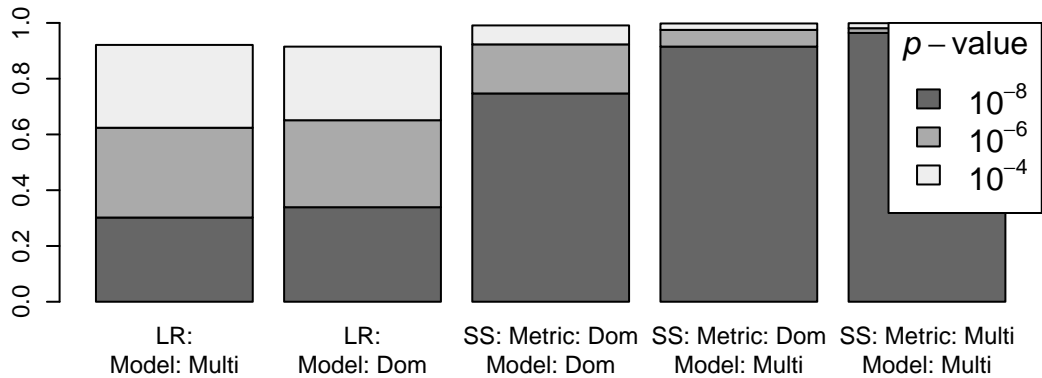

**Recessive Scenario 3 Power**

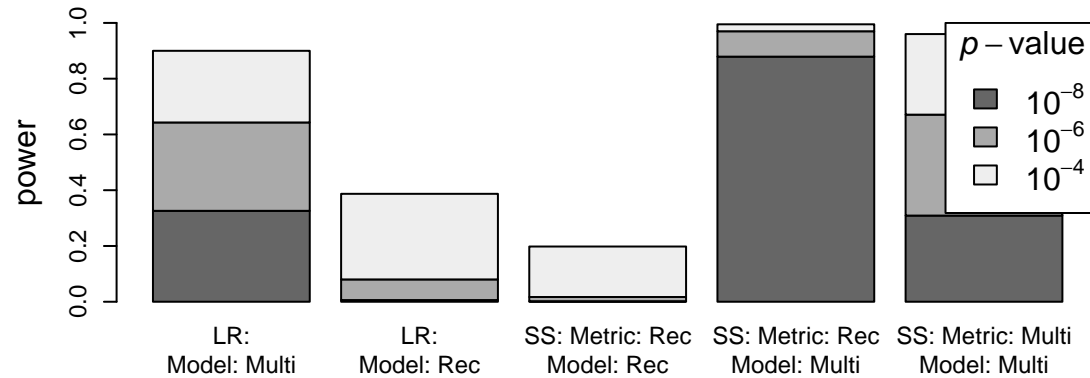

Supplement: gepi0038-0173-sd3.pdf [file gepi0038-0173-sd3.pdf]
